# Supplementary figures and images for: Interplay between abiotic (drought) and biotic (virus) stresses in tomato plants
Source: PubMed Central journal article supplement — Mol Plant Pathol. 2021 Dec 30;23(4):475–88. doi: 10.1111/mpp.13172 (PMC8916204; doi:10.1111/mpp.13172), 2021-12-30

(a)

Leaf

Root

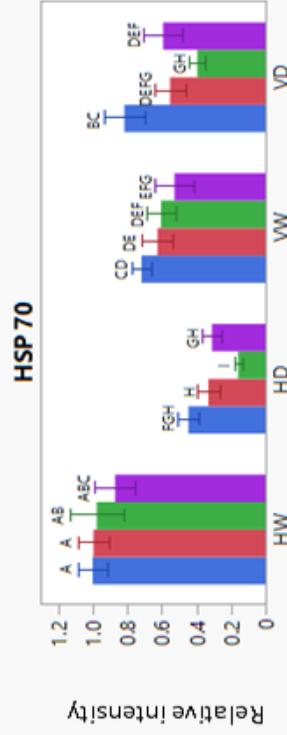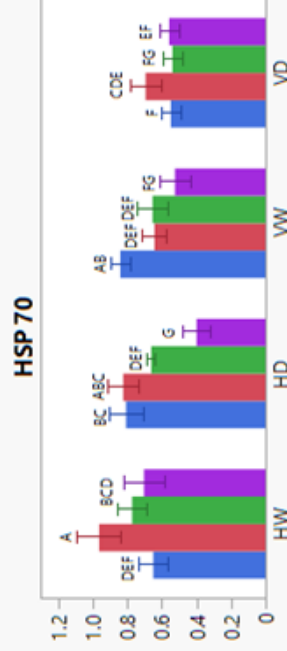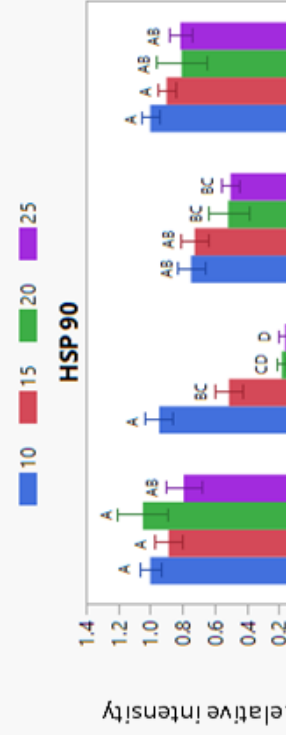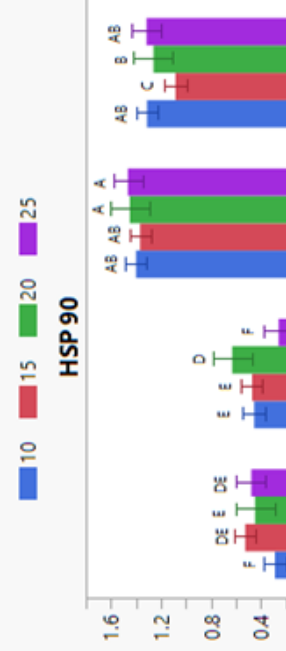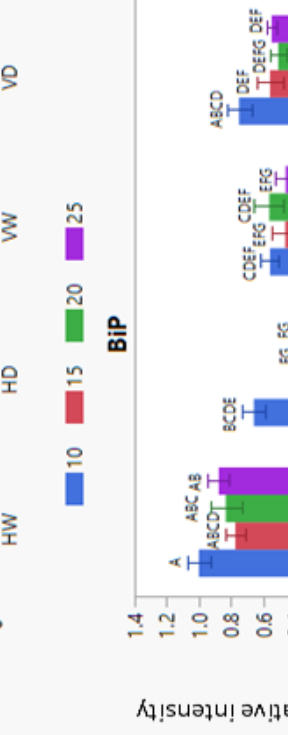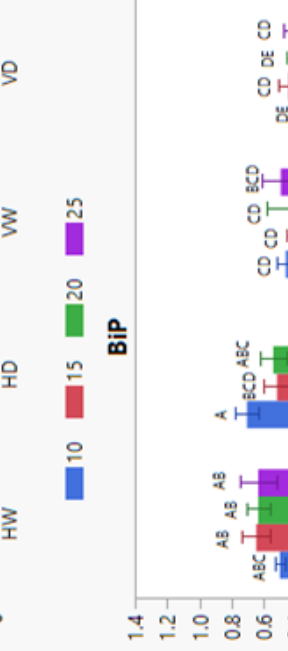

## Leaf

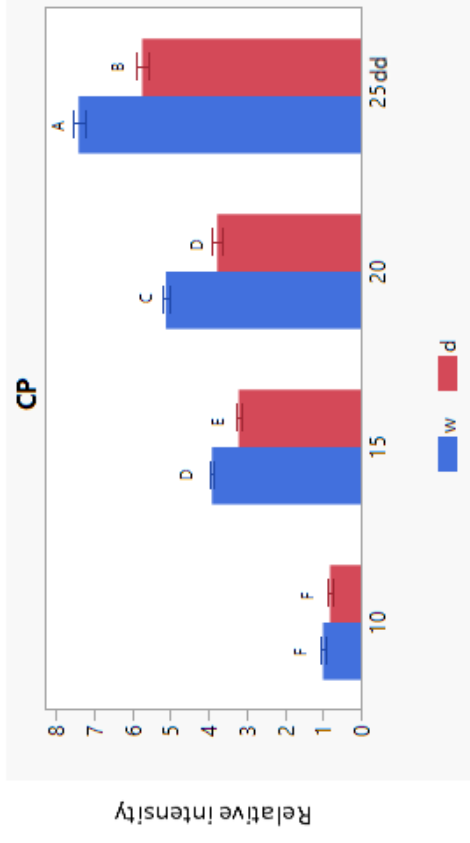

## Root

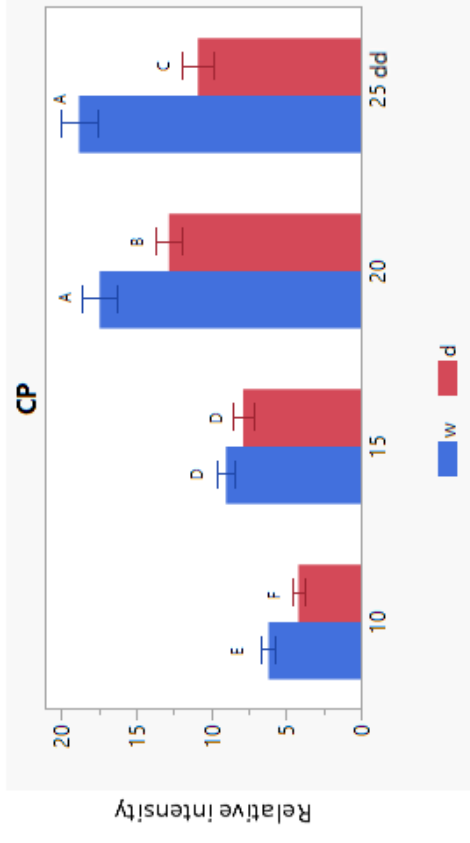

## ATG8

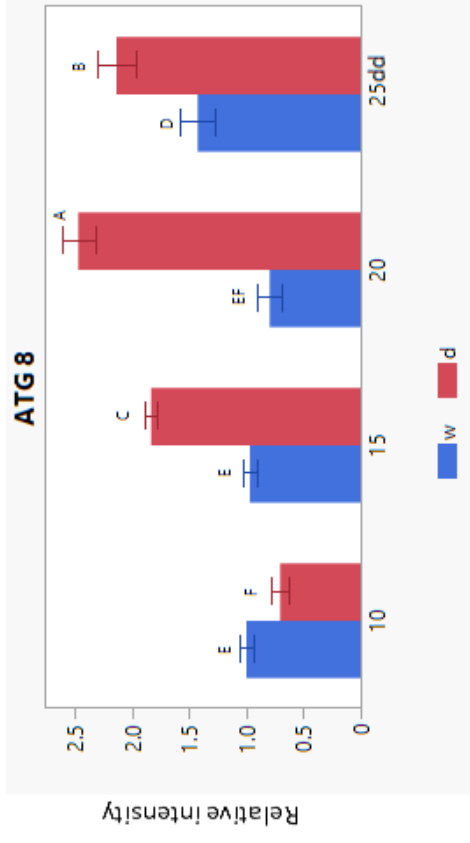

## ATG8

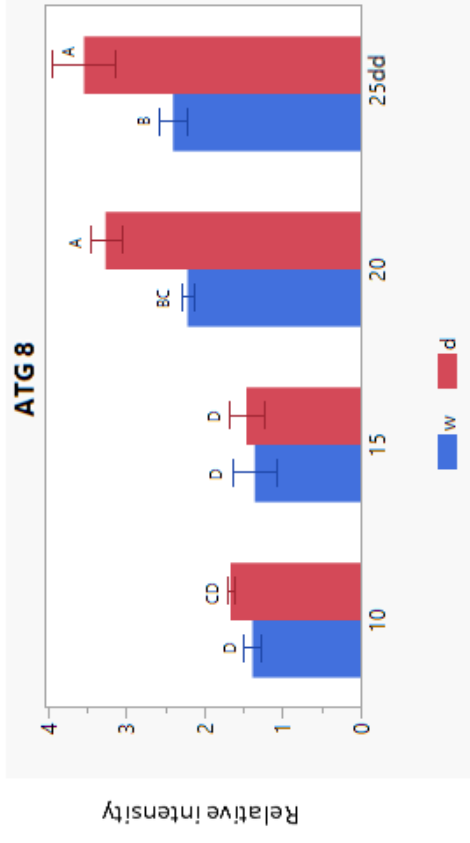

(b)

Supplement: MPP-23-475-s003.pdf [file MPP-23-475-s003.pdf]
